# Supplementary material for: Proteome of Staphylococcus aureus Biofilm Changes Significantly with Aging
Source: Int J Mol Sci. 2022 Jun 8;23(12):6415. doi: 10.3390/ijms23126415 (PMC9223533; doi:10.3390/ijms23126415)
Supplement: Supplementary file 1 [file ijms-23-06415-s001.zip › ijms-1708554-supplementary Tables.xlsx]

## Sheet: Suppl. Table S1
Table S1: Functional classification of the significantly upregulated proteins in 3dwb in comparison to planktonic and 12dwb (p<0.05). *FC denotes fold change; ** CM denotes Cytoplasmic Membrane.
SN	Accession ID	Protein Name	3DWB (FC)*	Gene Name	Protein Pathways	Subcellular Localisation	p Value
1	AIO20306.1	glycosyltransferase	4.32304	tagX SA0596		Unknown	0.0134774
2	AIO20241.1	acetyl-CoA acetyltransferase	3.56971	vraB SA0534	Metabolic pathways, Biosynthesis of antibiotics, Microbial metabolism in diverse environments, Carbon metabolism, Biosynthesis of secondary metabolites, Valine, leucine and isoleucine degradation, Two-component system, Terpenoid backbone biosynthesis, Fatty acid metabolism, Lysine degradation, Synthesis and degradation of ketone bodies, Propanoate metabolism, Glyoxylate and dicarboxylate metaboli…	Cytoplasmic	0.00702825
3	AIO20635.1	hypothetical protein KQ76_04890	3.42775	SACOL1046		Unknown	0.000370515
4	AIO20267.1	NAD(P)H-dependent oxidoreductase	3.17021	SA0558		Unknown	2.972e-05
5	AIO19750.1	transposase	2.91443	SA0379		Cytoplasmic	0.00195514
6	AIO19867.1	peptide ABC transporter substrate-binding protein	2.9074	SACOL0187	Quorum sensing	Unknown	0.00524861
7	AIO20180.1	2-amino-4-hydroxy-6-hydroxymethyldihydropteridine pyrophosphokinase	2.78498	folK SACOL0560	Metabolic pathways, Folate biosynthesis	Cytoplasmic	0.00821194
8	AIO20754.1	fibrinogen-binding protein	2.77824	SA1000		Extracellular	0.00210974
9	AIO21317.1	hypothetical protein KQ76_08475	2.76046	SA1452		Extracellular	0.000777275
10	AIO20957.1	30S ribosomal protein S14	2.75595	rpsN rpsN2 SA1171	Ribosome	Cytoplasmic 9.97	0.00608579
11	AIO21082.1	zinc metallopeptidase	2.58964	SACOL1500		CM	0.00734456
12	AIO21503.1	restriction endonuclease subunit S	2.5659	hsdS		Unknown	0.00661623
13	AIO21839.1	hyaluronate lyase	2.50281	hysA		Extracellular	0.00136295
14	AIO20444.1	glyceraldehyde-3-phosphate dehydrogenase	2.34103	gapA1 gap gapA SA0727	Metabolic pathways, Biosynthesis of antibiotics, Biosynthesis of amino acids, Microbial metabolism in diverse environments, Carbon metabolism, Biosynthesis of secondary metabolites, Glycolysis / Gluconeogenesis	Cytoplasmic	0.00194585
15	AIO21863.1	30S ribosomal protein S5	2.32947	rpsE SA2031	Ribosome	Cytoplasmic	0.000923701
16	AIO20122.1	cystathionine gamma-synthase	2.32506	metB	Metabolic pathways, Biosynthesis of antibiotics, Biosynthesis of amino acids, Cysteine and methionine metabolism, Glycine, serine and threonine metabolism, Sulfur metabolism	Cytoplasmic	0.000366962
17	OOC89123.1	heme ABC transporter ATP-binding protein	2.3166	SACOL0779		Cytoplasmic	4.37428e-05
18	AIO22129.1	helicase	2.28292	SACOL2499		Unknown	0.00178424
19	AIO21372.1	helicase DnaB	2.27118	SACOL1732		Cytoplasmic	0.0247414
20	AIO21528.1	hypothetical protein KQ76_09615	2.26405	SA1657		Unknown	0.00413462
21	AIO20460.1	coagulase	2.16507	SACOL0857		Extracellular	0.0181195
22	AIO21800.1	chromosome partitioning protein ParA	2.15669	SA1969		Cytoplasmic	0.00129439
23	AIO21327.1	adenine phosphoribosyltransferase	2.14955	apt SA1461	Metabolic pathways, Purine metabolism	Cytoplasmic	0.00407762
24	AIO19985.1	N-acetylmannosamine-6-phosphate 2-epimerase	2.12892	nanE SACOL0315	Amino sugar and nucleotide sugar metabolism	Cytoplasmic	0.0191549
25	AIO21111.1	lipoprotein	2.12428	SACOL1528		Unknown	0.0119865
26	AIO20869.1	prolyl-tRNA synthetase	2.11503	proS SA1106	Aminoacyl-tRNA biosynthesis	Cytoplasmic	0.00109051
27	AIO21190.1	aldo/keto reductase	2.11429	SACOL1543		Cytoplasmic	0.00340065
28	AIO19888.1	coagulase	2.09835	coa		Extracellular	0.00226701
29	AIO21086.1	3-phosphoshikimate 1-carboxyvinyltransferase	2.09101	aroA SACOL1504	Metabolic pathways, Biosynthesis of secondary metabolites, Biosynthesis of antibiotics, Biosynthesis of amino acids, Phenylalanine, tyrosine and tryptophan biosynthesis	Cytoplasmic	0.000866702
30	AIO21153.1	hypothetical protein KQ76_07625	2.08479	SACOL0347		Cytoplasmic	0.00876518
31	AIO20531.1	NADH-dependent flavin oxidoreductase	2.08462	SACOL0959		Cytoplasmic	0.0208442
32	AIO20616.1	glycosyl transferase family 1	2.07726	SACOL1043		Cytoplasmic	0.00185596
33	AIO20898.1	(dimethylallyl)adenosine tRNA methylthiotransferase	2.06422	miaB SA1134		Cytoplasmic	0.00957496
34	AIO22086.1	epimerase	2.05735	SA2231		Cytoplasmic	0.0184028
35	AIO20143.1	thymidylate kinase	2.02549	tmk SA0440	Metabolic pathways, Pyrimidine metabolism	Cytoplasmic	0.0238472
36	AIO20221.1	HAD family hydrolase	2.01913	SACOL0602	Metabolic pathways, Biosynthesis of secondary metabolites, Biosynthesis of antibiotics, Glyoxylate and dicarboxylate metabolism	Cytoplasmic	0.00850291
37	AIO21443.1	hypothetical protein KQ76_09120	2.00732	SA1573		Unknown	0.00789271
38	AIO22323.1	histidinol-phosphate aminotransferase	2.00625	SACOL2701	Metabolic pathways, Biosynthesis of secondary metabolites, Biosynthesis of antibiotics, Biosynthesis of amino acids, Phenylalanine, tyrosine and tryptophan biosynthesis, Novobiocin biosynthesis, Tyrosine metabolism, Histidine metabolism, Phenylalanine metabolism	Cytoplasmic	0.00214171
39	AIO21737.1	UDP-N-acetylglucosamine 1-carboxyvinyltransferase	2.00517	murA1 murA SA1902	Metabolic pathways, Peptidoglycan biosynthesis, Amino sugar and nucleotide sugar metabolism	Cytoplasmic	0.000172417

## Sheet: Suppl. Table S2
Table S2: Functional classification of the significantly upregulated proteins in 12dwb in comparison to planktonic and 3dwb (p <0.05). *FC denotes fold change; ** CM denotes Cytoplasmic Membrane.
SN	Accession ID	Protein Name	12DWB (FC)*	Gene Name	Protein Pathways	Subcellular Localisation	p Value
1	AIO22305.1	hypothetical protein KQ76_13935	5.51769	SA2451		Unknown	0.0301381
2	AIO22223.1	type II secretion protein	3.58616	SA2371		Unknown	0.00341024
3	AIO21210.1	2-oxoisovalerate dehydrogenase	3.10625	SACOL1561	Metabolic pathways, Biosynthesis of antibiotics, Biosynthesis of secondary metabolites, Valine, leucine and isoleucine degradation, Propanoate metabolism	Cytoplasmic	0.0119191
4	AIO20937.1	hypothetical protein KQ76_06475	2.84284	SAS040		Unknown	0.00522015
5	AIO20163.1	ribose-phosphate pyrophosphokinase	2.81449	prs SA0458	Metabolic pathways, Biosynthesis of secondary metabolites, Biosynthesis of antibiotics, Microbial metabolism in diverse environments, Biosynthesis of amino acids, Carbon metabolism, Purine metabolism, Pentose phosphate pathway	Cytoplasmic	0.0217871
6	AIO21226.1	octanoyltransferase	2.6803	lipM SA1363	Metabolic pathways, Lipoic acid metabolism	Cytoplasmic	0.00814678
7	AIO20979.1	sodium:alanine symporter	2.67458	alsT		CM	0.0202475
8	AIO20780.1	cell division protein MraZ	2.5849	mraZ SA1021		Cytoplasmic	0.0256948
9	AIO20800.1	phosphoribosyl transferase	2.52741	pyrR SA1041	Metabolic pathways, Pyrimidine metabolism	Cytoplasmic	0.00271649
10	AIO21539.1	pseudouridine synthase	2.49953	SA1668		Cytoplasmic	0.0216811
11	AIO19795.1	acetoin reductase	2.49125	butA SA0122	Butanoate metabolism	Cytoplasmic	0.0246177
12	AIO21707.1	4'-phosphopantetheinyl transferase	2.36799	acpS dpj SA1875	Pantothenate and CoA biosynthesis	Cytoplasmic	0.0145774
13	AIO21864.1	50S ribosomal protein L18	2.33263	rplR SA2032	Ribosome	Cytoplasmic	0.00102337
14	AIO21765.1	CTP synthetase	2.3222	pyrG ctrA SA1929	Metabolic pathways, Pyrimidine metabolism	Cytoplasmic	0.0113333
15	AIO20657.1	cytochrome C oxidase subunit III	2.31185	qoxC SA0911	Metabolic pathways, Oxidative phosphorylation	CM	0.00818913
16	AIO22274.1	tributyrin esterase	2.30418	SA2422		Unknown	0.00153141
17	AIO21564.1	general stress protein	2.29379	SA1692		Cytoplasmic	0.0437824
18	AIO20599.1	peptide chain release factor 3	2.27198	prfC SACOL1025		Cytoplasmic	0.0315111
19	AIO21825.1	PTS system lactose-specific transporter subunits IICB	2.26532	lacE SACOL2181	Metabolic pathways, Phosphotransferase system, Galactose metabolism	CM	0.0226211
20	AIO20620.1	hypothetical protein KQ76_04815	2.2034	SACOL1585		Unknown	0.0146525
21	AIO21934.1	octopine dehydrogenase	2.20106	SA2095		Cytoplasmic	0.0270892
22	AIO20680.1	hypothetical protein KQ76_05130	2.17684	SA0933		Unknown	0.0415972
23	AIO21860.1	preprotein translocase subunit SecY	2.15096	secY SA2028	Quorum sensing, Bacterial secretion system, Protein export	CM	0.0168683
24	AIO20807.1	orotate phosphoribosyltransferase	2.12902	pyrE SA1048	Metabolic pathways, Pyrimidine metabolism	Cytoplasmic	0.0298007
25	AIO21830.1	galactose-6-phosphate isomerase	2.12654	lacA SA1997	Metabolic pathways, Galactose metabolism	Unknown	0.02287
26	AIO22037.1	nitrite reductase	2.07785	nasD	Microbial metabolism in diverse environments, Nitrogen metabolism	Cytoplasmic	0.000136083
27	AIO20864.1	uridylate kinase	2.06553	pyrH smbA SA1101	Metabolic pathways, Pyrimidine metabolism	Cytoplasmic	0.0285642
28	AIO21798.1	arginase	2.03946	arg SA1968	Metabolic pathways, Biosynthesis of secondary metabolites, Biosynthesis of antibiotics, Biosynthesis of amino acids, Arginine and proline metabolism, Arginine biosynthesis	Cytoplasmic	0.00928647
29	AIO20370.1	transporter associated domain protein	2.03756	SA0657		CM	0.00296592
30	AIO21879.1	50S ribosomal protein L4	2.03008	rplD SA2046	Ribosome	Unknown	0.0482772
31	AIO21892.1	aminoacyltransferase	2.02601	femX fmhB SA2057	Metabolic pathways, Peptidoglycan biosynthesis	Cytoplasmic	0.0494555
32	AIO20666.1	phosphoribosylformylglycinamidine synthase	2.0068	purS SA0919		Cytoplasmic	0.000548365
33	OOC91313.1	5-(carboxyamino)imidazole ribonucleotide mutase	2.00654	purE SA0916	Metabolic pathways, Biosynthesis of antibiotics, Purine metabolism	CM	0.0018492

## Sheet: Suppl. Table S3
Table S3: Functional classification of the significantly downregulated proteins in 3dwb in comparison to planktonic and 12dwb (p <0.05). *FC denotes fold change; ** CM denotes Cytoplasmic Membrane.
SN	Accession ID	Protein Name	Gene Name	3DWB (FC)*	Protein Pathways	Subcellular Localisation	p value
1	AIO21024.1	cold-shock protein	cspA SA1234	0.123762		Cytoplasmic	0.000433667
2	AIO20326.1	response regulator GraR	graR SACOL0716	0.187364	Two-component system, Cationic antimicrobial peptide (CAMP) resistance	Cytoplasmic	0.00250128
3	AIO20762.1	hypothetical protein KQ76_05550	SA1005	0.225436		Unknown	0.00179664
4	AIO19905.1	nucleoside hydrolase	SACOL0225	0.239974		Cytoplasmic	0.000743712
5	AIO20630.1	hypothetical protein KQ76_04865	SACOL1575	0.242666		Unknown	0.00138688
6	AIO20479.1	arsenate reductase	SA0759	0.246313		Cytoplasmic	0.00422045
7	AIO21491.1	hypothetical protein KQ76_09360	SACOL1851	0.27921		Cytoplasmic	0.00523591
8	AIO20144.1	hypothetical protein KQ76_02220	SA0441	0.28005		Unknown	0.00212671
9	AIO21391.1	oligoribonuclease	SA1526	0.315048	Metabolic pathways, Microbial metabolism in diverse environments, Sulfur metabolism	Cytoplasmic	0.00225961
10	AIO22206.1	acetyltransferase	oatA SA2354	0.321025		CM	0.00385562
11	AIO21365.1	50S ribosomal protein L20	rplT SA1502	0.323474	Ribosome	Cytoplasmic	0.00448649
12	AIO21530.1	peptidylprolyl isomerase	prsA SA1659	0.350032		CM	0.00077633
13	AIO21602.1	staphostatin A	SA1726	0.350146		Unknown	0.00548051
14	AIO20776.1	phenol soluble modulin	SACOL1186	0.351425	Quorum sensing	Unknown	0.000622091
15	AIO20368.1	PTS fructose transporter subunit IIC	fruA	0.366375	Metabolic pathways, Microbial metabolism in diverse environments, Fructose and mannose metabolism, Phosphotransferase system (PTS)	CM	0.00982772
16	AIO20049.1	pathogenicity island protein	SA1824	0.367462		Unknown	0.0106059
17	AIO21436.1	peptidase M28	SA1566	0.376539		Cytoplasmic	0.000354591
18	AIO21371.1	primosomal protein DnaI	dnaI	0.386742		Cytoplasmic	0.0197634
19	AIO20579.1	oligopeptidase PepB	SA0859	0.386896		Cytoplasmic	0.000298696
20	AIO20152.1	methionine--tRNA ligase	metG metS SA0448	0.386994	Selenocompound metabolism, Aminoacyl-tRNA biosynthesis	Cytoplasmic	1.7344e-05
21	AIO20286.1	recombinase	SA0577	0.387949		Cytoplasmic	0.00109264
22	AIO20439.1	Clp protease	clpP SA0723	0.391612		Cytoplasmic	0.00670741
23	AIO21970.1	ribose 5-phosphate isomerase	rpiA SA2127	0.393301	Metabolic pathways, Microbial metabolism in diverse environments, Carbon metabolism, Biosynthesis of secondary metabolites, Biosynthesis of antibiotics, Biosynthesis of amino acids, Pentose phosphate pathway	Cytoplasmic	0.00204417
24	AIO20435.1	thioredoxin reductase	trxB SA0719	0.393357	Selenocompound metabolism	Cytoplasmic	0.00187587
25	AIO21363.1	DNA mismatch repair protein MutT	SA1501	0.399655		Cytoplasmic	3.53798e-05
26	AIO20575.1	tryptophanyl-tRNA synthetase	trpS SA0855	0.400156	Aminoacyl-tRNA biosynthesis	Cytoplasmic	0.000526989
27	AIO21606.1	nicotinate phosphoribosyltransferase	SA1729	0.400853	Metabolic pathways, Nicotinate and nicotinamide metabolism	Cytoplasmic	0.000441124
28	AIO20282.1	transcriptional regulator	sarA SA0573	0.403085		Cytoplasmic	0.0102645
29	AIO21595.1	lipoprotein	SA1719	0.406147		Unknown	0.0102645
30	AIO22291.1	isochorismatase	SA2438	0.408318		Unknown	0.00205903
31	AIO21531.1	3'-5' exonuclease	cbf1	0.409195		Cytoplasmic	0.000422988
32	AIO20398.1	7-cyano-7-deazaguanine reductase	queF SA0683	0.409599	Metabolic pathways, Folate biosynthesis	Cytoplasmic	0.000206252
33	AIO19802.1	cell wall surface anchor family protein	sasD SACOL0119	0.411033		Cellwall	0.00715374
34	AIO21623.1	thioredoxin	SA1743	0.414322		Unknown	0.0042208
35	AIO20231.1	glycosyl transferase family 1	SACOL0612	0.41468		Cytoplasmic	0.0195744
36	AIO22235.1	3-methyl-2-oxobutanoate hydroxymethyltransferase	panB SA2392	0.421619	Metabolic pathways, Biosynthesis of secondary metabolites, Pantothenate and CoA biosynthesis	Unknown	0.000152791
37	AIO22158.1	glyoxalase	SA2310	0.425909	Metabolic pathways, Microbial metabolism in diverse environments, Benzoate degradation, Xylene degradation, Degradation of aromatic compounds	Unknown	0.00137787
38	AIO22006.1	acetyltransferase	SA2159	0.429836		Cytoplasmic	0.00582832
39	AIO20913.1	glutamine synthetase	glnA SACOL1329	0.430878	Metabolic pathways, Two-component system, Biosynthesis of amino acids, Glyoxylate and dicarboxylate metabolism, Arginine biosynthesis, Microbial metabolism in diverse environments, Alanine, aspartate and glutamate metabolism, Nitrogen metabolism	Cytoplasmic	0.00039883
40	AIO21929.1	transcriptional regulator	SA2091	0.438259		Unknown	0.0036227
41	AIO21020.1	hydrolase	SACOL1433	0.438482		Cytoplasmic	0.00389714
42	AIO22054.1	phosphoglyceromutase	gpmA SA2204	0.44627	Metabolic pathways, Microbial metabolism in diverse environments, Carbon metabolism, Biosynthesis of secondary metabolites, Biosynthesis of antibiotics, Biosynthesis of amino acids, Methane metabolism, Glycolysis / Gluconeogenesis, Glycine, serine and threonine metabolism	Unknown	0.00135921
43	OOC89529.1	dUTP pyrophosphatase	dut SACOL0357	0.448323	Metabolic pathways, Pyrimidine metabolism	Cytoplasmic	3.70988e-05
44	AIO21679.1	ABC transporter ATP-binding protein	vga	0.448495		Cytoplasmic	0.00408492
45	AIO21204.1	hypothetical protein KQ76_07895	SACOL1555	0.4505		Cytoplasmic	0.000580316
46	AIO21459.1	riboflavin synthase subunit alpha	ribE SACOL1819	0.450842	Metabolic pathways, Riboflavin metabolism, Biosynthesis of secondary metabolites	Cytoplasmic	0.00625914
47	AIO20507.1	alanine-phosphoribitol ligase	dltA SACOL0935	0.454885	Two-component system, Cationic antimicrobial peptide (CAMP) resistance, D-Alanine metabolism, Staphylococcus aureus infection	Cytoplasmic	0.00040605
48	AIO21007.1	oligoendopeptidase F	SA1216	0.455584		Cytoplasmic	0.00499664
49	AIO21222.1	elongation factor P	efp SA1359	0.457272		Cytoplasmic	0.00141132
50	AIO20422.1	sigma-54 modulation protein	hpf SA0707	0.4623		Cytoplasmic	0.001343
51	AIO20857.1	ATP-dependent protease subunit HslV	hslV clpQ SA1096	0.46374		Cytoplasmic	0.000940318
52	AIO21536.1	Cro/Cl family transcriptional regulator	SA1665	0.464476		Cytoplasmic	0.00897133
53	AIO20880.1	polynucleotide phosphorylase	pnp pnpA SA1117	0.467479	Purine metabolism, Pyrimidine metabolism, RNA degradation	Cytoplasmic	0.00442684
54	AIO21401.1	peroxidase	tpx SACOL1762	0.468165		Unknown	0.0031245
55	AIO20237.1	6-phospho 3-hexuloisomerase	SA0529	0.468767	Metabolic pathways, Microbial metabolism in diverse environments, Carbon metabolism, Biosynthesis of amino acids, Pentose phosphate pathway, Methane metabolism	Unknown	0.000859809
56	AIO21562.1	RecX family transcriptional regulator	recX SA1690	0.470435		Cytoplasmic	0.0057659
57	AIO21854.1	DNA-directed RNA polymerase subunit alpha	rpoA SA2023	0.471755	Metabolic pathways, Purine metabolism, Pyrimidine metabolism, RNA polymerase	Cytoplasmic	0.00471114
58	AIO21926.1	MarR family transcriptional regulator	sarR SA2089	0.475929		Cytoplasmic	0.00411426
59	AIO21055.1	membrane protein	SA1265	0.484821		CM	0.0186629
60	AIO20895.1	2-oxoglutarate ferredoxin oxidoreductase subunit alpha	SA1131	0.486367	Metabolic pathways, Microbial metabolism in diverse environments, Carbon metabolism, Biosynthesis of antibiotics, Glycolysis / Gluconeogenesis, Butanoate metabolism, Pyruvate metabolism, Citrate cycle (TCA cycle)	Cytoplasmic	0.0011732
61	AIO20402.1	ribonucleotide-diphosphate reductase subunit beta	nrdF	0.486599	Metabolic pathways, Purine metabolism, Pyrimidine metabolism	Cytoplasmic	0.00293301
62	AIO19739.1	50S ribosomal protein L9	rplI SA0014	0.486765	Ribosome	Cytoplasmic	0.00226543
63	AIO21458.1	GTP cyclohydrolase	ribBA SACOL1818	0.489254	Metabolic pathways, Riboflavin metabolism, Biosynthesis of secondary metabolites, Folate biosynthesis	Cytoplasmic	0.00164113
64	AIO20695.1	hypothetical protein KQ76_05210	SA0947	0.489751		Unknown	0.00235199
65	AIO20819.1	16S rRNA methyltransferase	SA1060	0.493035		Cytoplasmic	0.0140349
66	AIO20413.1	peptidase T	pepT SA0698	0.493283		Cytoplasmic	0.00807425
67	AIO21057.1	ribonuclease H	SACOL1471	0.493416	DNA replication	Cellwall	0.0185851
68	AIO20517.1	cytosol aminopeptidase	SACOL0945	0.500967	Metabolic pathways, Glutathione metabolism	Cytoplasmic	0.00151508
69	AIO19747.1	5'-nucleotidase	sasH SACOL0024	0.501543		Cellwall	0.00189312
70	AIO19727.1	RNA-binding protein	SA0003	0.502102		Cytoplasmic	0.0205437
71	AIO22093.1	hypothetical protein KQ76_12830	SACOL2456	0.502235		Unknown	0.0017958
72	OOC93864.1	hypothetical protein BWO94_01480	SACOL2385	0.502768		Cellwall	0.0106609
73	OOC89542.1	hypothetical protein BWO94_12900	SACOL0336	0.506211		Unknown	0.0300541
74	AIO20955.1	catalase	katA SA1170	0.507095	Carbon metabolism, Biosynthesis of secondary metabolites, Biosynthesis of antibiotics, Glyoxylate and dicarboxylate metabolism, Tryptophan metabolism	Cytoplasmic	0.00246116
75	AIO21778.1	general stress protein	dps	0.507828		Cytoplasmic	0.00793782
76	AIO21954.1	HAD family hydrolase	SA2111	0.509241		Cytoplasmic	0.000396473
77	AIO20165.1	50S ribosomal protein L25	rplY ctc SA0459	0.509758	Ribosome	Cytoplasmic	0.00663292

## Sheet: Suppl. Table S4
Table S4: Functional classification of the significantly downregulated proteins in 12dwb in comparison to planktonic and 3dwb (p <0.05). *FC denotes fold change; ** CM denotes Cytoplasmic Membrane.
SN	Accession ID	Protein Name	12DWB (FC)*	Gene Name	Protein Pathways	Subcellular Localization	p value
1	AIO21867.1	30S ribosomal protein S14	0.261572	rpsZ rpsN1 SA2034.1 SAS079	Ribosome	Cytoplasmic	0.0137798
2	AIO20145.1	DNA polymerase III subunit delta'	0.309073	SACOL0526	Metabolic pathways, Mismatch repair, Pyrimidine metabolism, DNA replication, Purine metabolism, Homologous recombination	Cytoplasmic	0.0252487
3	AIO21889.1	hypothetical protein KQ76_11750	0.34135	SAS081		Cytoplasmic	0.00935154
4	AIO21919.1	urease subunit gamma	0.34847	ureA SA2082	Metabolic pathways, Microbial metabolism in diverse environments, Purine metabolism, Arginine biosynthesis	Cytoplasmic	0.00204196
5	AIO21128.1	hypothetical protein KQ76_07495	0.353548			Cytoplasmic	0.0128814
6	AIO20189.1	excinuclease ABC subunit B	0.35832	SA0481		Cytoplasmic	0.00358988
7	AIO21302.1	transcription elongation factor GreA	0.434849	greA SA1438		Cytoplasmic	0.0241052
8	AIO20865.1	ribosome recycling factor	0.435245	frr SA1102		Cytoplasmic	0.0024807
9	AIO21993.1	hemin ABC transporter ATP-binding protein	0.447647	hrtA SA2149	ABC transporters	CM	0.00547939
10	AIO20742.1	DNA polymerase	0.451454	SA0990		Cytoplasmic	0.00708111
11	AIO19898.1	uroporphyrin-III methyltransferase	0.453108	SA0230		Unknown	0.00263531
12	AIO20759.1	fibrinogen-binding protein	0.465455	SA1004	Staphylococcus aureus infection	Unknown	0.011581
13	AIO20893.1	hypothetical protein KQ76_06215	0.480333	SACOL1306		Cytoplasmic	0.0094634
14	AIO20478.1	thioredoxin	0.484062	SA0758		Cytoplasmic	0.00557655
15	AIO20419.1	DegV domain-containing protein	0.492784	SACOL0812		Cytoplasmic	0.0216389
16	AIO21475.1	glyoxal reductase	0.49886	SA1606		Cytoplasmic	0.0275918
17	AIO22050.1	amino acid ABC transporter substrate-binding protein	0.507852	SACOL2412	ABC transporters	Unknown	0.00623481
18	AIO21432.1	cell division protein FtsK	0.509902	SA1562		CM	0.00673534

## Sheet: Suppl. Table S5
Table S5: Functional classification of the significantly upregulated common proteins between 3dwb and 12dwb compared with planktonic culture (p <0.05). *FC denotes fold change; ** CM denotes Cytoplasmic Membrane.
SN	Accession ID	Protein Name	Gene Name	3dwb (FC)*	12dwb (FC)*	Protein Pathways	Subcellular Localisation	p Value
1	AIO20486.1	hypothetical protein KQ76_04110	SA0772	5.09	2.36		Unknown	0.000397681
2	AIO21910.1	molybdenum ABC transporter permease	modB	4.68	2.57	ABC transporters	CM	0.00108946
3	AIO20812.1	DNA-directed RNA polymerase subunit omega	rpoZ SA1053	4.52	3.74	Metabolic pathways, Pyrimidine metabolism, RNA polymerase, Purine metabolism	Unknown	0.000904083
4	AIO19852.1	branched-chain amino acid transporter II carrier protein	SA0180	4.04	3.81		CM
5	AIO21307.1	hypothetical protein KQ76_08425	SA1443	3.57	2.1		Cytoplasmic	0.00866218
6	AIO21316.1	hypothetical protein KQ76_08470	SAS049	3.38	2.21		Unknown	0.0015529
7	AIO21773.1	membrane protein	SA1937	3.32	3.2		CM	8.57136e-05
8	AIO21982.1	hypothetical protein KQ76_12230	SACOL2344	3.3	2.32		Cytoplasmic	0.00324444
9	AIO21211.1	2-oxoisovalerate dehydrogenase	bfmBAA	3.19	2.12	Metabolic pathways, Biosynthesis of secondary metabolites, Biosynthesis of antibiotics, Propanoate metabolism, Valine, leucine and isoleucine degradation	Cytoplasmic	0.00334813
10	AIO21660.1	DNA-binding protein		3.12	2.97		Cytoplasmic	0.00165204
11	AIO22226.1	fructosamine kinase	SA2374	2.97	2.71		Cytoplasmic	0.000268392
12	AIO21786.1	lytic regulatory protein	truncated-SA	2.89	2.02		CM	0.01408
13	AIO22040.1	formate/nitrite transporter	SACOL2401	2.84	2.56		CM	0.00563722
14	AIO22234.1	pantoate--beta-alanine ligase	panC SACOL2614	2.82	2.91	Metabolic pathways, Biosynthesis of secondary metabolites, beta-Alanine metabolism, Pantothenate and CoA biosynthesis	Cytoplasmic	0.000736711
15	AIO20178.1	dihydropteroate synthase	folP SA0472	2.76	3.28	Metabolic pathways, Folate biosynthesis	Cytoplasmic	0.0118949
16	AIO20787.1	cell division protein FtsA	ftsA SA1028	2.74	2.94		Cytoplasmic	0.00191049
17	AIO20718.1	glycerophosphodiester phosphodiesterase	SA0969	2.72	2.38	Glycerophospholipid metabolism	Cytoplasmic	0.00252427
18	AIO21337.1	50S ribosomal protein L27	rpmA SA1471	2.64	2.64	Ribosome	Cytoplasmic	0.0036433
19	AIO21727.1	membrane protein	yidC SA1893	2.53	2.46	Quorum sensing, Protein export, Bacterial secretion system	CM	0.00288761
20	AIO21819.1	hypothetical protein KQ76_11385	SA1986	2.52	3.27		CM	0.00280856
21	AIO22003.1	L-lactate permease	SACOL2363	2.47	2.5		CM	0.0111212
22	AIO21769.1	hypothetical protein KQ76_11075	SA1933	2.47	2.1		Cytoplasmic	0.00205824
23	AIO20806.1	orotidine 5'-phosphate decarboxylase	pyrF SA1047	2.42	2.54	Metabolic pathways, Pyrimidine metabolism	Cytoplasmic	0.000623182
24	AIO20697.1	spermidine/putrescine ABC transporter ATP-binding protein	potA SA0950	2.39	2.3	ABC transporters	CM	0.00635522
25	AIO21790.1	glucosamine--fructose-6-phosphate aminotransferase	glmS SACOL2145	2.37	2.13	Metabolic pathways, Amino sugar and nucleotide sugar metabolism, Alanine, aspartate and glutamate metabolism, Biosynthesis of antibiotics	Cytoplasmic	0.00168229
26	AIO20817.1	peptide deformylase	SA1058	2.35	2.1		Cytoplasmic	0.000709148
27	AIO21826.1	PTS system lactose-specific transporter subunit IIA	lacF SA1993	2.34	2.36	Metabolic pathways, Galactose metabolism, Phosphotransferase system (PTS)	Cytoplasmic	0.00531065
28	AIO21333.1	ATP-dependent DNA helicase RuvB	ruvB SACOL1696	2.33	2.55	Homologous recombination	Cytoplasmic	0.0023674
29	AIO20958.1	guanosine 5'-monophosphate oxidoreductase	guaC SACOL1371	2.28	3.28	Purine metabolism	Cytoplasmic	0.000472788
30	AIO20949.1	threonine synthase	thrC SACOL1363	2.27	2	Metabolic pathways, Biosynthesis of secondary metabolites, Microbial metabolism in diverse environments, Vitamin B6 metabolism, Glycine, serine and threonine metabolism, Biosynthesis of amino acids	Cytoplasmic	0.0011347
31	AIO19973.1	5'-nucleotidase	SA0295	2.23	2.77		Unknown	0.000430905
32	AIO20535.1	argininosuccinate lyase	argH SA0821	2.21	2.43	Metabolic pathways, Biosynthesis of secondary metabolites, Biosynthesis of antibiotics, Biosynthesis of amino acids, Alanine, aspartate and glutamate metabolism, Arginine biosynthesis	Cytoplasmic	0.0193605
33	AIO20535.1	argininosuccinate lyase	argH SA0821	2.21	2.43	Metabolic pathways, Biosynthesis of secondary metabolites, Biosynthesis of antibiotics, Biosynthesis of amino acids, Alanine, aspartate and glutamate metabolism, Arginine biosynthesis	Cytoplasmic	0.0193605
34	AIO21768.1	pantothenate kinase	coaW SA1932	2.17	2.01	Metabolic pathways, Pantothenate and CoA biosynthesis	Unknown	0.00211107
35	AIO21133.1	capsid protein		2.17	2.03		Extracellular	0.00296745
36	AIO20536.1	argininosuccinate synthase	argG SA0822	2.15	2.01	Metabolic pathways, Biosynthesis of secondary metabolites, Biosynthesis of antibiotics, Biosynthesis of amino acids, Alanine, aspartate and glutamate metabolism, Arginine biosynthesis	Cytoplasmic	0.00395835
37	AIO20205.1	50S ribosomal protein L10	rplJ SA0497	2.15	2.16	Ribosome	Cytoplasmic	0.00463023
38	AIO22278.1	amino acid APC transporter	arcD	2.1	2.23		CM	0.0391995
39	AIO20778.1	hypothetical protein KQ76_05635	SA1019	2.09	2.41		Unknown	0.00140481
40	AIO20985.1	LytR family transcriptional regulator	msrR SA1195	2.08	2.13		CM	0.0190387
41	OOC90965.1	glutamine ABC transporter ATP-binding protein	SA1674	2.05	2.83		CM	0.0050893
42	AIO19823.1	UDP-N-acetylglucosamine 2-epimerase	capG	2.02	2.09	Metabolic pathways, Amino sugar and nucleotide sugar metabolism	Cytoplasmic	0.032174

## Sheet: Suppl. Table S6
Table S6: Functional classification of the significantly downregulated common proteins between 3dwb and 12dwb compared with planktonic culture (p <0.05). *FC denotes fold change; ** CM denotes Cytoplasmic Membrane.
SN	Accession ID	Protein Name	Gene Name	3dwb (FC)*	12dwb (FC)*	Protein Pathways	Subcellular Localisation	p Value
1	AIO21667.1	delta-hemolysin	hld SA1841.1 SAS065	0.03	0.03	Quorum sensing	Cytoplasmic	0.00202798
2	AIO20700.1	spermidine/putrescine ABC transporter substrate-binding protein	potD	0.05	0.08	ABC transporters	Unknown	0.000261039
3	AIO20763.1	alpha-hemolysin	SA1007	0.07	0.06		Extracellular	0.0014177
4	AIO22369.1	phosphodiesterase	hlb SACOL2003	0.08	0.12		Extracellular	0.00557688
5	OOC90902.1	calcium-binding protein	SACOL1846	0.08	0.05		Unknown	0.000519117
6	AIO20644.1	cysteine protease	sspB SACOL1056	0.09	0.11		Extracellular	0.00589982
7	AIO22207.1	transglycosylase	isaA SACOL2584	0.1	0.11		Extracellular	0.00522438
8	AIO20556.1	hypothetical protein KQ76_04470	SA0841	0.11	0.08		CM	0.000577823
9	AIO19942.1	peptidase M23	lytM SACOL0263	0.11	0.12		Extracellular	3.29658e-05
10	AIO20056.1	hypothetical protein KQ76_01725		0.12	0.1		CM	0.00591512
11	AIO20660.1	chitinase	SA0914	0.12	0.09		Extracellular	0.000263472
12	AIO19947.1	staphyloxanthin biosynthesis protein	SACOL0270	0.13	0.13		Extracellular	0.00366722
13	AIO21349.1	DNA-3-methyladenine glycosylase	tag	0.14	0.4	Base excision repair	Unknown	0.0320075
14	AIO21509.1	serine protease	splC SACOL1867	0.14	0.28		Extracellular	0.0338133
15	AIO20463.1	thermonuclease	nuc SACOL0860	0.14	0.16		Extracellular	0.0251762
16	AIO20332.1	peptidase M23B	SA0620	0.15	0.14		Cellwall	0.00308667
17	AIO20645.1	glutamyl endopeptidase	sspA SACOL1057	0.15	0.15	Quorum sensing	Extracellular	0.00255203
18	AIO20716.1	SCP-like extracellular protein	SA0967	0.15	0.17		Unknown	5.26481e-05
19	AIO19770.1	1-phosphatidylinositol phosphodiesterase	plc	0.17	0.19	Inositol phosphate metabolism	Extracellular	0.0232649
20	AIO20387.1	glycerol phosphate lipoteichoic acid synthase	ltaS SA0674	0.17	0.15	Metabolic pathways, Glycerolipid metabolism	CM	0.00599236
21	AIO22290.1	N-acetylmuramoyl-L-alanine amidase	SACOL2666	0.17	0.14		Extracellular	3.98815e-05
22	AIO21492.1	hypothetical protein KQ76_09365	SACOL1852	0.19	0.16		Unknown	0.00339928
23	AIO21221.1	acetyl-CoA carboxylase	accB	0.19	0.23	Metabolic pathways, Microbial metabolism in diverse environments, Biosynthesis of secondary metabolites, Biosynthesis of antibiotics, Pyruvate metabolism, Carbon metabolism, Fatty acid metabolism, Propanoate metabolism, Fatty acid biosynthesis	Cytoplasmic	0.0024015
24	AIO19779.1	peptidoglycan-binding protein LysM	spa SACOL0095	0.21	0.16	Staphylococcus aureus infection	Cell wall	0.00590188
25	AIO20739.1	ribonuclease HIII	rnhC SACOL1150	0.22	0.22	DNA replication	Unknown	0.0134555
26	AIO20228.1	hydrolase	sdrD SA0520	0.22	0.22	Staphylococcus aureus infection	Cell wall	0.00414956
27	AIO20126.1	N-acetylmuramoyl-L-alanine amidase	sle1 aaa SA0423	0.23	0.29		Cell wall	0.000463513
28	AIO20637.1	acetyltransferase	SA0893	0.23	0.17		Cytoplasmic	0.00520597
29	AIO21273.1	molecular chaperone DnaJ	dnaJ SA1408	0.24	0.21		Cytoplasmic	0.00151197
30	AIO20577.1	competence negative regulator MecA	mecA SA0857	0.24	0.31		Cytoplasmic	0.0103519
31	AIO20418.1	ABC transporter	SACOL0811	0.24	0.27		Cytoplasmic	0.000801282
32	AIO21353.1	delta-aminolevulinic acid dehydratase	hemB SA1492	0.24	0.27	Metabolic pathways, Microbial metabolism in diverse environments, Biosynthesis of secondary metabolites, Porphyrin and chlorophyll metabolism	Cytoplasmic	0.0258392
33	AIO21508.1	serine protease	splE SACOL1865	0.24	0.4	Quorum sensing	Extracellular	0.0136436
34	AIO19987.1	lipase	lip2 geh SA0309	0.24	0.14	Metabolic pathways, Glycerolipid metabolism	Extracellular	0.00941493
35	AIO20651.1	mannosyl-glycoprotein endo-beta-N-acetylglucosamidase	atl nag SACOL1062	0.25	0.24		Extracellular	0.0279133
36	AIO21549.1	Fur family transcriptional regulator	perR SACOL1919	0.25	0.48		Cytoplasmic	0.0166183
37	AIO22042.1	glutathione S-transferase	SACOL2402	0.25	0.29		Unknown	0.0223355
38	AIO21406.1	Free methionine-(R)-sulfoxide reductase	SACOL1768	0.26	0.26	Cysteine and methionine metabolism	Cytoplasmic	0.00503023
39	AIO20229.1	bis(5'-nucleosyl)-tetraphosphatase	sdrE SACOL0610	0.26	0.26	Staphylococcus aureus infection	Cellwall	0.00279044
40	AIO22060.1	gamma-hemolysin subunit A	hlgC SA2208	0.26	0.35	Staphylococcus aureus infection	Extracellular	0.000152835
41	AIO20738.1	phenylalanyl-tRNA synthase subunit beta	pheT SA0986	0.27	0.38	Aminoacyl-tRNA biosynthesis	Cytoplasmic	0.0333111
42	AIO21601.1	cysteine protease	sspP scpA SA1725	0.27	0.23		Extracellular	0.00848499
43	AIO20874.1	50S ribosomal protein L7	SA1111	0.27	0.34		Unknown	0.00542806
44	AIO21505.1	serine protease	splF SA1627	0.27	0.25	Quorum sensing	Extracellular	0.0163681
45	AIO22081.1	sodium:proton antiporter	SA2228	0.27	0.21		CM	0.0127308
46	AIO20884.1	zinc protease	SA1121	0.27	0.29		Cytoplasmic	0.0010402
47	AIO20093.1	superantigen-like protein	set11	0.28	0.33	Staphylococcus aureus infection	Extracellular	0.00537493
48	AIO21182.1	transcriptional regulator	srrA SA1323	0.28	0.33	Two-component system	Cytoplasmic	0.000163667
49	AIO20960.1	secretion protein	SACOL1373	0.28	0.47		Unknown	0.00334413
50	AIO22350.1	peptidase		0.28	0.13		Extracellular	0.0101923
51	AIO21805.1	uridylyltransferase	SA1974	0.28	0.36		Cytoplasmic	0.000693035
52	AIO21160.1	single-stranded DNA-binding protein	ssb	0.28	0.39	Homologous recombination, Mismatch repair, DNA replication	Unknown	0.00530332
53	AIO22099.1	peptidase M28	SA2244	0.29	0.32		Cytoplasmic	0.0105822
54	AIO22349.1	hypothetical protein KQ76_14165		0.29	0.3		Unknown	1.77507e-05
55	AIO20756.1	formyl peptide receptor-like 1 inhibitory protein	flr SA1001	0.3	0.35	Staphylococcus aureus infection	Unknown	0.00726469
56	AIO20951.1	HAD family hydrolase	SA1167	0.3	0.43		Cytoplasmic	0.00667939
57	AIO22292.1	adhesin	sasF SACOL2668	0.3	0.43		Cellwall	0.00128061
58	AIO19988.1	alpha/beta hydrolase	SACOL0391	0.31	0.32		Cytoplasmic	0.00123207
59	AIO20737.1	phenylalanine--tRNA ligase	pheS SA0985	0.31	0.35	Aminoacyl-tRNA biosynthesis	Cytoplasmic	0.00104899
60	AIO21246.1	penicillin-binding protein	pbp3	0.31	0.36	Metabolic pathways, beta-Lactam resistance, Peptidoglycan biosynthesis	CM	0.0010197
61	OOC94232.1	aureolysin	aur SACOL2659	0.31	0.32	Staphylococcus aureus infection, Cationic antimicrobial peptide (CAMP) resistance	Extracellular	0.00130277
62	AIO21853.1	50S ribosomal protein L17	rplQ SA2022	0.31	0.44	Ribosome	Cytoplasmic	0.00203188
63	AIO21842.1	toxin	SACOL2197	0.32	0.4		CM	0.000160943
64	AIO21565.1	hypothetical protein KQ76_09970	SAS054	0.32	0.37		Cytoplasmic	0.0291943
65	AIO22160.1	lactate dehydrogenase	ldhD ddh SACOL2535	0.33	0.29	Pyruvate metabolism, Microbial metabolism in diverse environments	Cytoplasmic	0.00887712
66	AIO20515.1	hypothetical protein KQ76_04260	SACOL0943	0.33	0.5		Cytoplasmic	0.00263049
67	AIO20442.1	hypothetical protein KQ76_03870	SACOL0835	0.33	0.32		Cytoplasmic	0.00728382
68	OOC94758.1	alpha/beta hydrolase	SA1990	0.34	0.33		Unknown	0.000224831
69	AIO22074.1	glycerate kinase	SA2220	0.34	0.24	Metabolic pathways, Microbial metabolism in diverse environments, Biosynthesis of antibiotics, Glycerolipid metabolism, Glyoxylate and dicarboxylate metabolism, Glycine, serine and threonine metabolism	Cytoplasmic	0.00103876
70	AIO21275.1	heat shock protein GrpE	grpE SA1410	0.34	0.36		Cytoplasmic	0.0119355
71	AIO22275.1	clumping factor B	clfB SA2423	0.34	0.33	Staphylococcus aureus infection	Cellwall	0.000826686
72	AIO20071.1	NADPH-dependent oxidoreductase	nfrA SACOL0453	0.34	0.26	Metabolic pathways, Riboflavin metabolism	Cytoplasmic	0.0159422
73	AIO22317.1	lipase	lip1 SA2463	0.35	0.2	Metabolic pathways, Glycerolipid metabolism	Extracellular	0.00232634
74	AIO19780.1	MarR family transcriptional regulator	sarS sarH1 SA0108	0.35	0.45		Cytoplasmic	0.00381654
75	AIO20100.1	hypothetical protein KQ76_01960	SA0395	0.35	0.14		Unknown	0.00258873
76	AIO20863.1	elongation factor Ts	tsf SACOL1276	0.35	0.36		Cytoplasmic	0.00248736
77	OOC93971.1	phosphoglucomutase	pgcA SA2279	0.36	0.41	Metabolic pathways, Microbial metabolism in diverse environments, Biosynthesis of secondary metabolites, Biosynthesis of antibiotics, Purine metabolism, Amino sugar and nucleotide sugar metabolism, Starch and sucrose metabolism, Streptomycin biosynthesis, Glycolysis / Gluconeogenesis, Pentose phosphate pathway, Galactose metabolism	Cytoplasmic	0.00603746
78	AIO21506.1	serine protease	splE SACOL1865	0.36	0.36		Extracellular	0.00332917
79	AIO20279.1	hypothetical protein KQ76_03005	SA0570	0.36	0.48		Unknown	0.0095828
80	AIO21343.1	membrane protein	SA1476	0.36	0.3		Unknown	0.00399317
81	AIO22338.1	adhesin		0.46	0.37		Cellwall	0.00445418
82	AIO20534.1	glycerophosphodiester phosphodiesterase	glpQ	0.37	0.22	Glycerophospholipid metabolism	Cellwall	0.00323622
83	AIO21274.1	molecular chaperone DnaK	dnaK SA1409	0.37	0.43	RNA degradation	Cytoplasmic	0.000934546
84	AIO21449.1	leucyl-tRNA synthetase	leuS SA1579	0.37	0.36	Aminoacyl-tRNA biosynthesis	Cytoplasmic	0.00302594
85	AIO21282.1	competence protein ComE	comEB	0.37	0.41	Metabolic pathways, Pyrimidine metabolism	Cytoplasmic	0.000674744
86	AIO20170.1	hypothetical protein KQ76_02355	SA0464	0.38	0.43		Cytoplasmic	8.97721e-05
87	AIO21073.1	hypothetical protein KQ76_07205	SACOL1491	0.38	0.51		Unknown	0.00191985
88	AIO21788.1	HAD family hydrolase	SA1957	0.38	0.3		Cytoplasmic	0.00157963
89	AIO22136.1	fibronectin-binding protein	fnbA SA2291	0.39	0.23	Bacterial invasion of epithelial cells	Cellwall	0.00461941
90	OOC92415.1	sphingomyelin phosphodiesterase	hlb SACOL2003	0.39	0.33	Quorum sensing, Metabolic pathways, Inositol phosphate metabolism, Glycerophospholipid metabolism, Biosynthesis of secondary metabolites	Extracellular	8.04135e-05
91	AIO21298.1	acetyl-CoA carboxylase biotin carboxylase subunit	SA1434	0.4	0.41	Metabolic pathways, Microbial metabolism in diverse environments, Biosynthesis of secondary metabolites, Biosynthesis of antibiotics, Pyruvate metabolism, Carbon metabolism, Fatty acid metabolism, Propanoate metabolism, Fatty acid biosynthesis	Cytoplasmic	0.00484443
92	AIO22387.1	replication-associated protein (plasmid)	SAP031	0.4	0.41		Unknown	0.00809039
93	AIO20202.1	antitermination protein NusG	nusG SA0494	0.4	0.46		Cytoplasmic	0.00033905
94	AIO21033.1	hypothetical protein KQ76_06965	SA1242	0.41	0.46		Unknown	0.000682766
95	AIO20885.1	zinc protease	SACOL1298	0.42	0.46		Unknown	0.00606513
96	AIO21583.1	ferritin	ftnA SA1709	0.42	0.44		Cytoplasmic	0.00126679
97	AIO20406.1	iron ABC transporter substrate-binding protein	SA0691	0.42	0.35	ABC transporters	CM	0.000401156
98	AIO20712.1	pyruvate carboxylase	pyc SACOL1123	0.43	0.5	Metabolic pathways, Pyruvate metabolism, Microbial metabolism in diverse environments, Biosynthesis of amino acids, Carbon metabolism, Citrate cycle (TCA cycle)	Cytoplasmic	0.00157098
99	AIO20704.1	hypothetical protein KQ76_05255	SA0957	0.43	0.49		Cytoplasmic	0.00226434
100	AIO21607.1	nitric oxide synthase	nos SA1730	0.43	0.44	Metabolic pathways, Biosynthesis of secondary metabolites, Arginine biosynthesis, Arginine and proline metabolism	Cytoplasmic	0.00682851
101	AIO22191.1	TetR family transcriptional regulator	SA2340	0.43	0.51		Cytoplasmic	0.0168255
102	AIO20225.1	HAD family hydrolase	SA0517	0.43	0.42		Cytoplasmic	0.00129283
103	AIO22285.1	hypothetical protein KQ76_13835	SACOL2661	0.43	0.37		Extracellular	0.0101381
104	AIO19949.1	type VII secretion protein EsaA	esaA SA0272	0.44	0.43		CM	0.00136419
105	AIO21157.1	replication protein		0.44	0.31		Cytoplasmic	0.00451775
106	AIO22336.1	pyrrolidone-carboxylate peptidase	pcp SACOL2714	0.44	0.32		Cytoplasmic	0.00214045
107	AIO20749.1	succinate dehydrogenase	sdhB	0.45	0.28	Metabolic pathways, Microbial metabolism in diverse environments, Biosynthesis of secondary metabolites, Biosynthesis of antibiotics, Carbon metabolism, Citrate cycle (TCA cycle), Oxidative phosphorylation, Butanoate metabolism	Cytoplasmic	0.011554
108	AIO20783.1	penicillin-binding protein	pbpA	0.46	0.39	Metabolic pathways, beta-Lactam resistance, Peptidoglycan biosynthesis	CM	0.00749327
109	AIO19900.1	nitric oxide dioxygenase	SA0231	0.47	0.34		Cytoplasmic	0.00241628
110	AIO21223.1	peptidase M24	SACOL1588	0.47	0.5		Cytoplasmic	6.19699e-06
111	AIO20194.1	glutamyl-tRNA synthetase	gltX SA0486	0.47	0.39	Metabolic pathways, Aminoacyl-tRNA biosynthesis	Cytoplasmic	0.000352212
112	AIO20273.1	arginine--tRNA ligase	argS SACOL0663	0.47	0.48	Aminoacyl-tRNA biosynthesis	Cytoplasmic	0.000231614
113	AIO20259.1	dihydrolipoamide dehydrogenase	SA0551	0.48	0.42		Cytoplasmic	0.0126599
114	AIO20623.1	conjugal transfer protein	SACOL1582	0.48	0.42		Unknown	0.00260117
115	AIO22143.1	hypothetical protein KQ76_13105	SACOL2519	0.48	0.3		Cytoplasmic	0.0330596
116	AIO21116.1	gamma-hemolysin subunit A	hlgC SA2208	0.48	0.35		Extracellular	0.0047973
117	AIO21194.1	ribonuclease Z	rnz SACOL1548	0.49	0.47		Cytoplasmic	0.0125419
118	AIO20555.1	phosphatidylethanolamine-binding protein	SACOL0984	0.49	0.49		Unknown	0.00539229
119	AIO20584.1	GTP pyrophosphokinase	SA0864	0.49	0.5	Purine metabolism	Cytoplasmic	0.00441113
120	AIO20455.1	hypothetical protein KQ76_03935	SACOL0851	0.49	0.42		Unknown	0.00456537
121	AIO20687.1	hypothetical protein KQ76_05170	SA0941	0.49	0.5		Cytoplasmic	0.00138091
122	AIO20838.1	cell division protein FtsY	ftsY SACOL1251	0.49	0.49	Quorum sensing, Protein export, Bacterial secretion system	CM	0.0282675
123	OOC91307.1	hypothetical protein BWO94_08325	SA1008	0.5	0.5		Unknown	0.00458062
124	AIO20835.1	acyl carrier protein	acpP hmrB SA1075	0.5	0.47		Cytoplasmic	0.0038613
125	AIO20196.1	cysteinyl-tRNA synthetase	cysS SACOL0576	0.5	0.41	Aminoacyl-tRNA biosynthesis	Cytoplasmic	0.00700149
126	AIO19963.1	QueA protein	SACOL0282	0.5	0.49		Cytoplasmic	0.00161143
127	AIO22017.1	hypothetical protein KQ76_12415	SA2168	0.5	0.39		Unknown	0.0122161
128	AIO20583.1	hypothetical protein KQ76_04610	SACOL1009	0.51	0.46		CM	0.00844168

## Sheet: Suppl. Table S7
Table S7: Relative correlation of the selected qPCR gene expression data to TMT protein expression data (exclusive and common) in 3dwb and 12dwb compared with planktonic. *FC denotes fold change
			TMT		qPCR
Accession ID	Protein Name	Gene	3dwb (FC)*	12dwb (FC)*	3dwb (FC)*	12dwb (FC)*
		Name
AIO20660.1	chitinase	SA0914	0.118	0.088	1.528	0.902
AIO20645.1	glutamyl endopeptidase	sspA	0.152	0.149	0.01	0.083
AIO20163.1	ribose-phosphate pyrophosphokinase	prs		2.814		3.94
AIO21892.1	aminoacyltransferase	femX		2.026		0.646
AIO20749.1	Succinate dehydrogenase	sdhB	0.452	0.283	1.1	3.3

## Sheet: Suppl. Table S8
Table S8: Primers used in this study
Gene Name	Primer Name	Primer sequence (5’-3’)			Position in gene	PCR size (bp)
SA0914	SA0914 F	ATTGCGATGATGCTATTTA			1124-1207	84
	SA0914 R	GGCGCTCATACACAGGTTC
prs	prs F	TCAGGACCGGCTAAAGAAC			784-918	55
	prs R	AGCTTGTGCGATTAAACCAG
sdhB	sdhB F	GCCACGTATGCCAGAGAAA			462-599	60
	sdhB R	CGAACTTGCGAGATTGCTT
pyc	pyc F	TCGTACAACGGCTATCAAGG			366-480	60
	pyc R	AATCATTAGCGGGAAACCAG
femX	femX F	ATTAACGAAATGGGCAGAAA			75-144	70
	femX R	GTCACGACCTACAGCGATT
